# Supplementary material for: Two New Flavones from Tridax procumbens Linn
Source: Molecules. 2010 Sep 9;15(9):6357–64. doi: 10.3390/molecules15096357 (PMC6257746; doi:10.3390/molecules15096357)

## Supporting Information

### Two New flavones from *Tridax procumbens* Linn.

Runsheng Xu<sup>1,2</sup>, Jing Zhang<sup>3</sup>, Ke Yuan<sup>1\*</sup>

<sup>1</sup> Research and Development Center of Natural Medicine, Zhejiang Agriculture and Forestry University, Linan 311300, China

<sup>2</sup> College of Chemistry and Life Science, Zhejiang Normal University, Jinhua 321004, China

<sup>3</sup> College of Pharmacy, Henan University of Traditional Chinese Medicine, Zhengzhou, 450008, China

- S1. <sup>1</sup>H spectrum of **Compound 1** in CD3OD
- S2. <sup>13</sup>C spectrum of **Compound 1** in CD3OD
- S3. DEPT 135 spectrum of **Compound 1** in CD3OD
- S4. <sup>1</sup>H-<sup>1</sup>H COSY spectrum of **Compound 1** in CD3OD
- S5. HSQC spectrum of **Compound 1** in CD3OD
- S6. HMBC spectrum of **Compound 1** in CD3OD
- S7. HR-ESI-MS spectrum of **Compound 1**
- S8. <sup>1</sup>H spectrum of **Compound 2** in CD3OD
- S9. <sup>13</sup>C spectrum of **Compound 2** in CD3OD
- S10. DEPT 135 spectrum of **Compound 2** in CD3OD
- S11. <sup>1</sup>H-<sup>1</sup>H COSY spectrum of **Compound 2** in CD3OD
- S12. HSQC spectrum of **Compound 2** in CD3OD
- S13. HR-ESI-MS spectrum of **Compound 2**

S1.  $^1\text{H}$  spectrum of **Compound 1** in  $\text{CD}_3\text{OD}$ 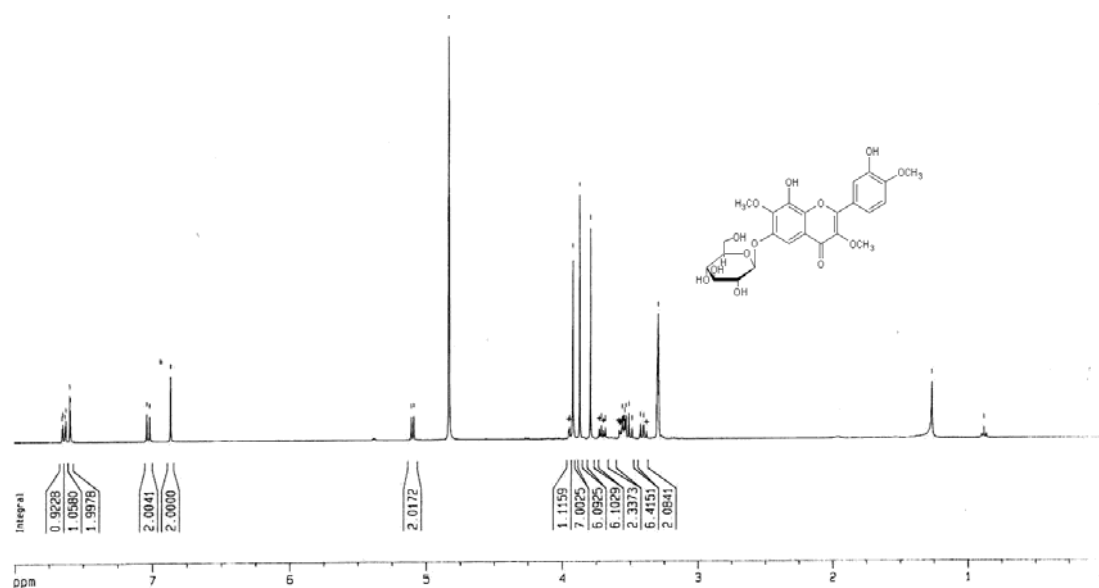S2.  $^{13}\text{C}$  spectrum of **Compound 1** in  $\text{CD}_3\text{OD}$ 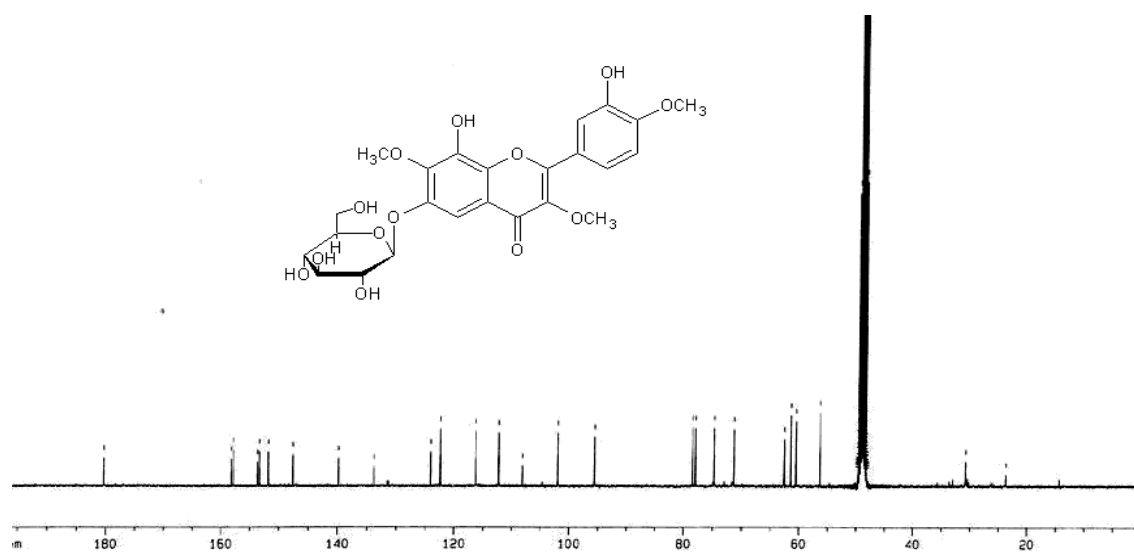

S3. DEPT 135 spectrum of **Compound 1** in CD<sub>3</sub>OD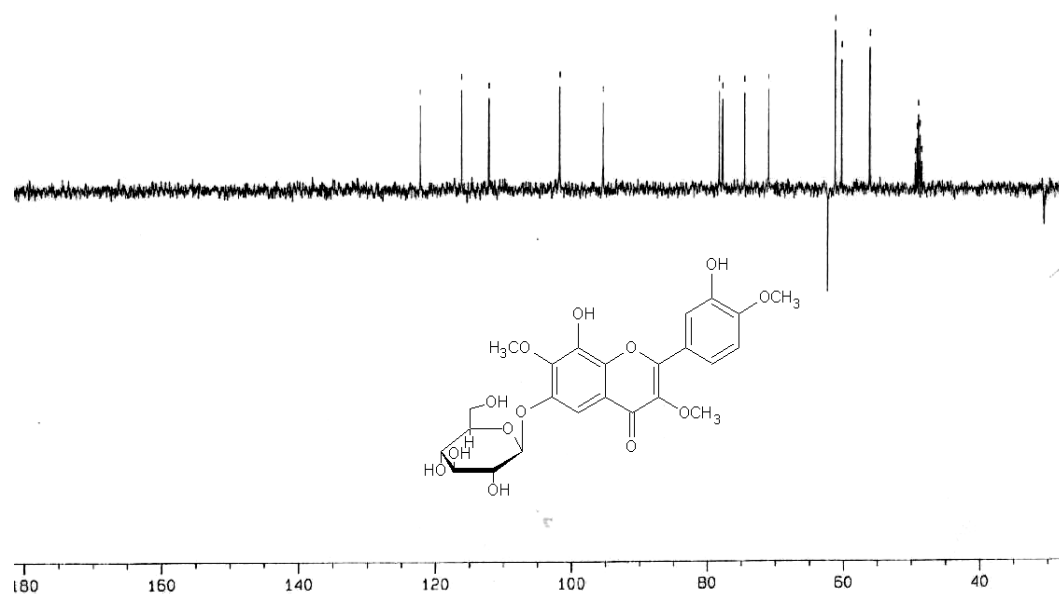S4. <sup>1</sup>H-<sup>1</sup>H COSY spectrum of **Compound 1** in CD<sub>3</sub>OD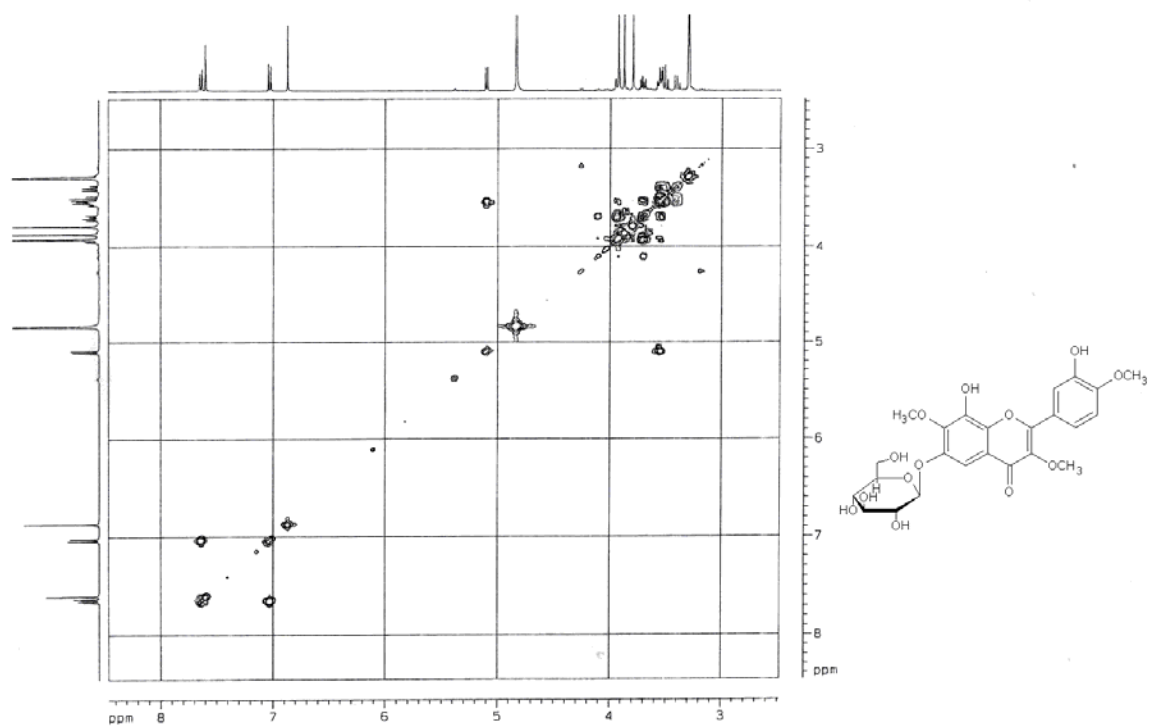

S5.HSQC spectrum of **Compound 1** in CD<sub>3</sub>OD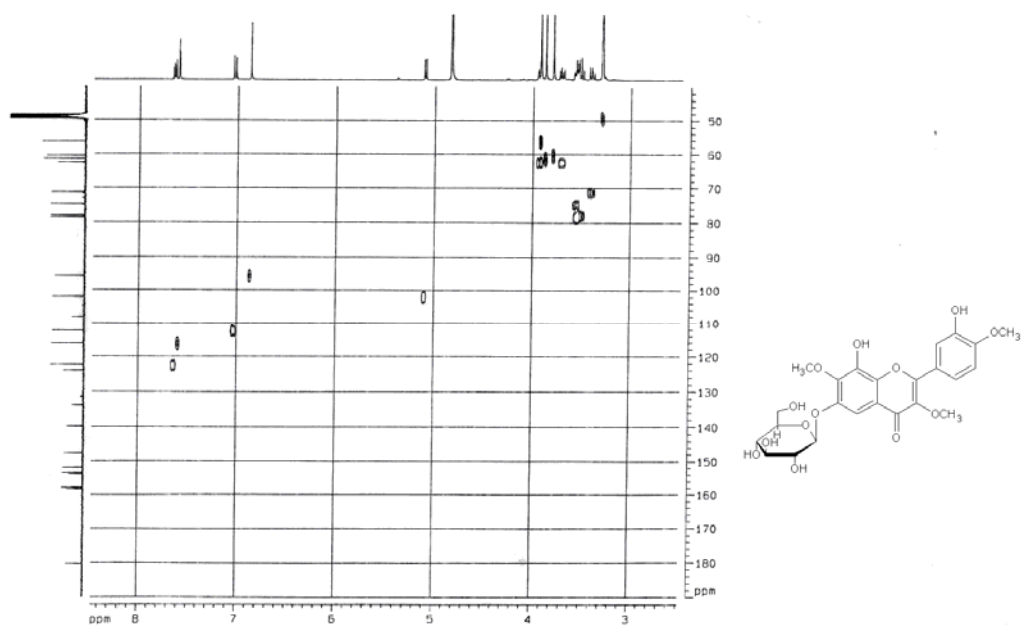S6.HMBC spectrum of **Compound 1** in CD<sub>3</sub>OD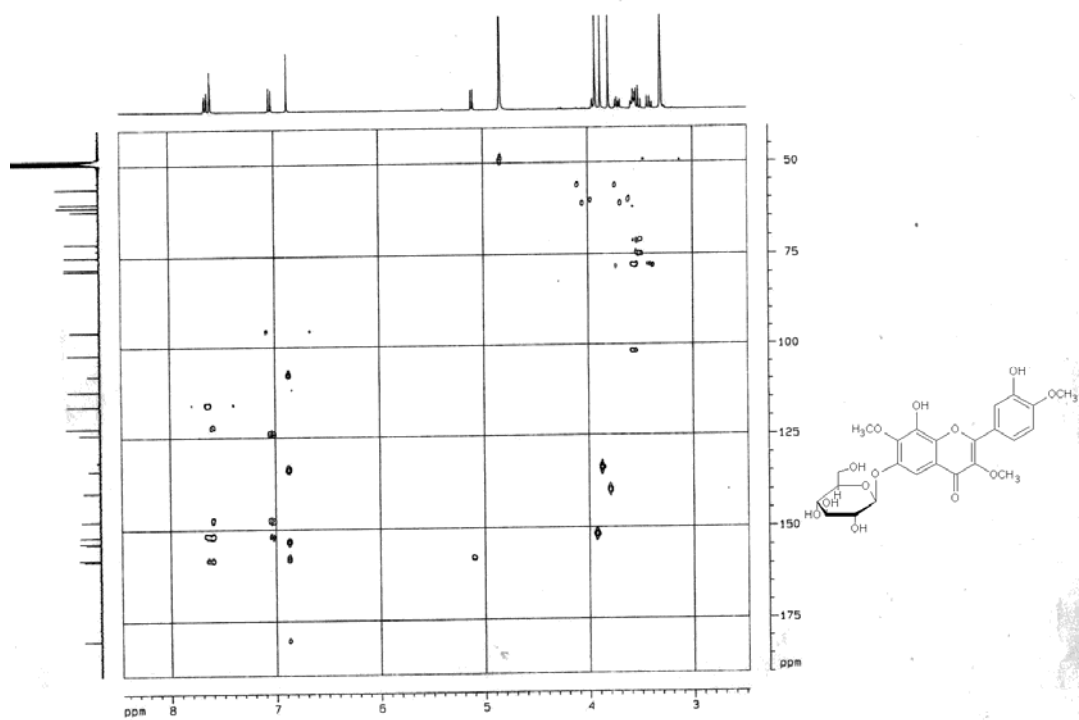

## S7.HR-ESI-MS spectrum of Compound 1

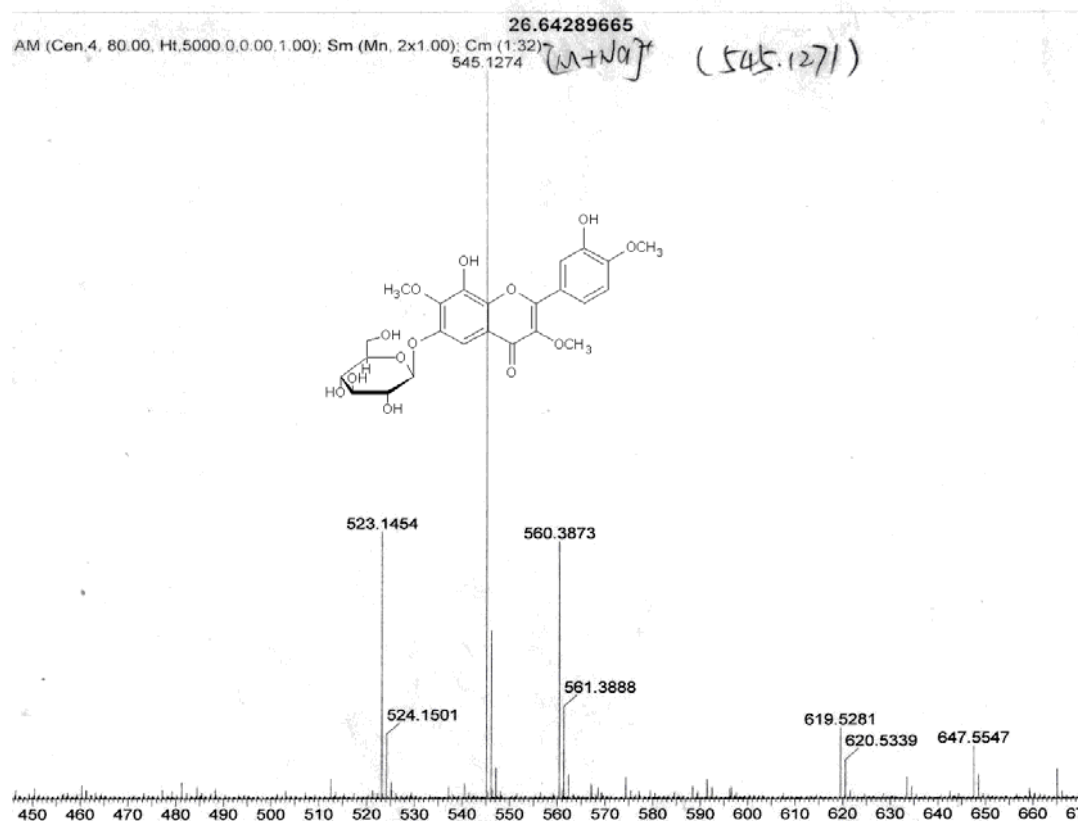S8.<sup>1</sup>H spectrum of Compound 2 in CD<sub>3</sub>OD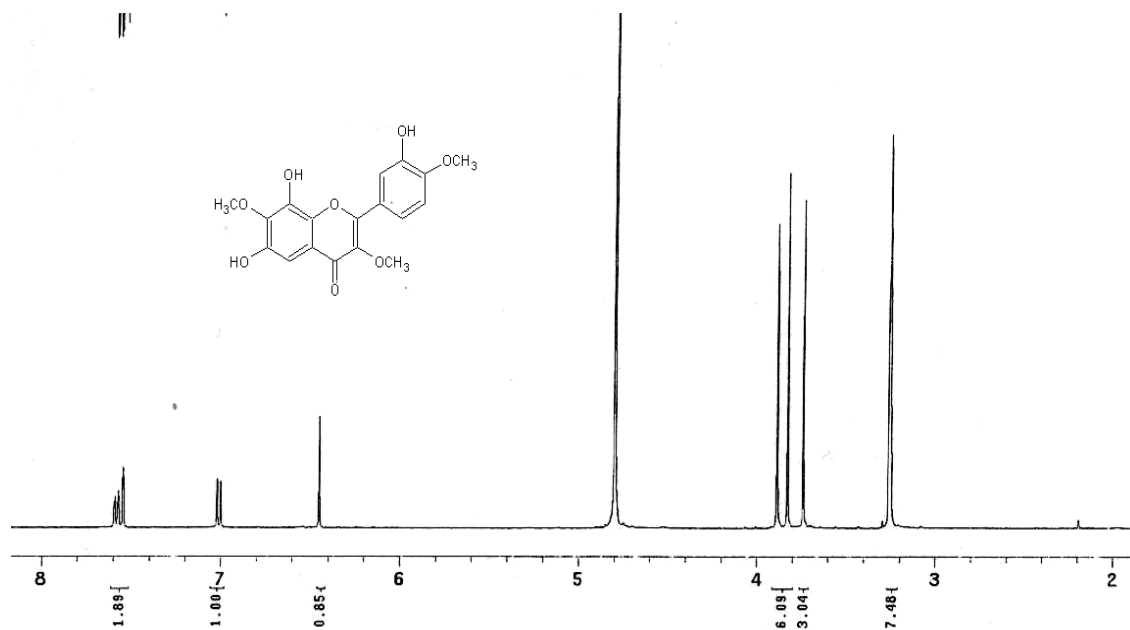

S9.  $^{13}\text{C}$  spectrum of **Compound 2** in  $\text{CD}_3\text{OD}$ 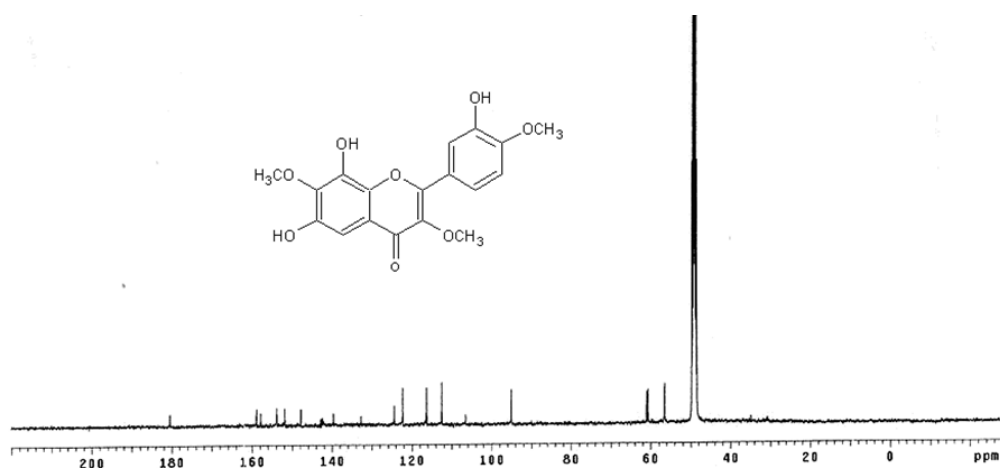S10. DEPT 135 spectrum of **Compound 2** in  $\text{CD}_3\text{OD}$ 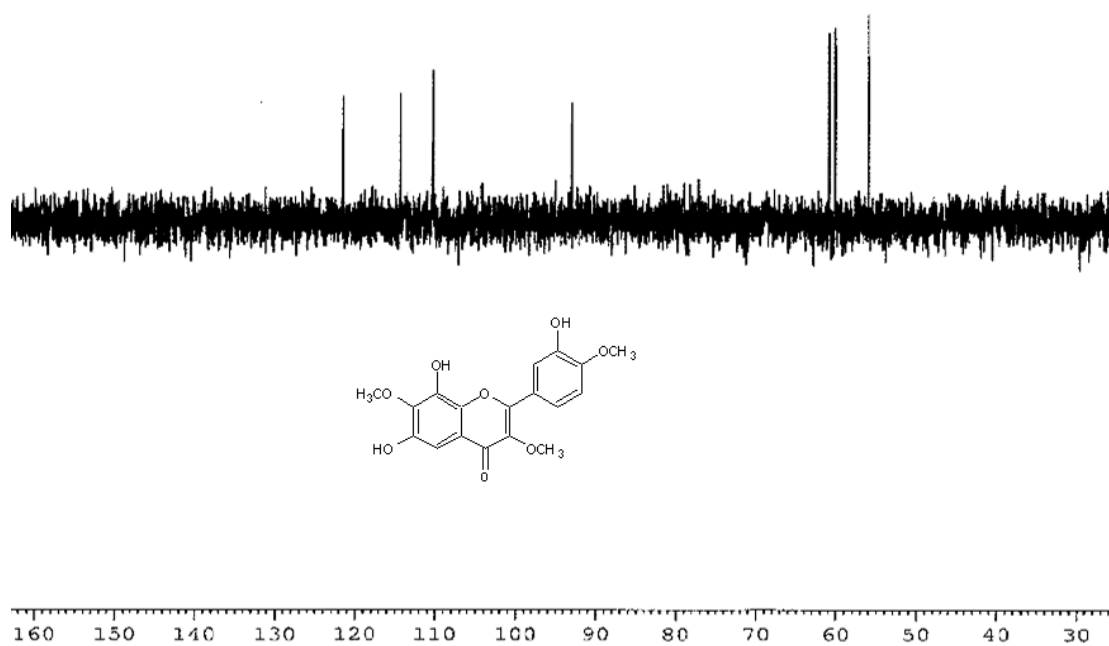

S11.  $^1\text{H}$ - $^1\text{H}$  COSY spectrum of **Compound 2** in  $\text{CD}_3\text{OD}$ 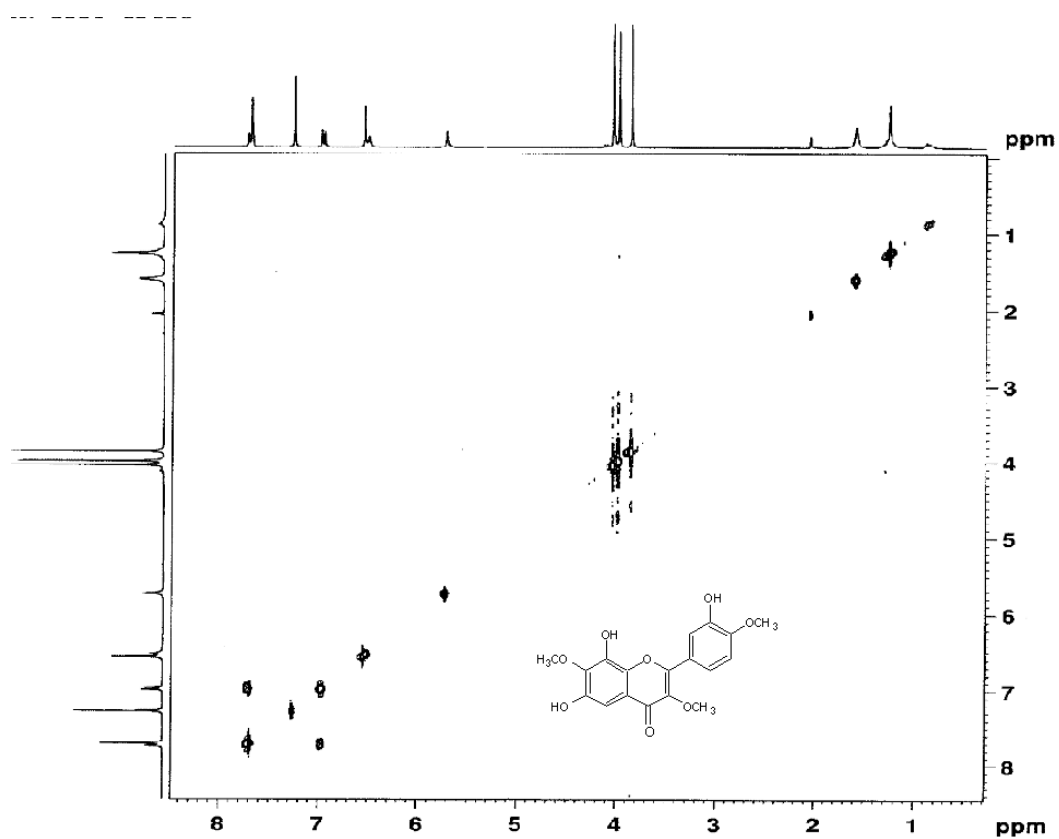S12. HSQC spectrum of **Compound 2** in  $\text{CD}_3\text{OD}$ 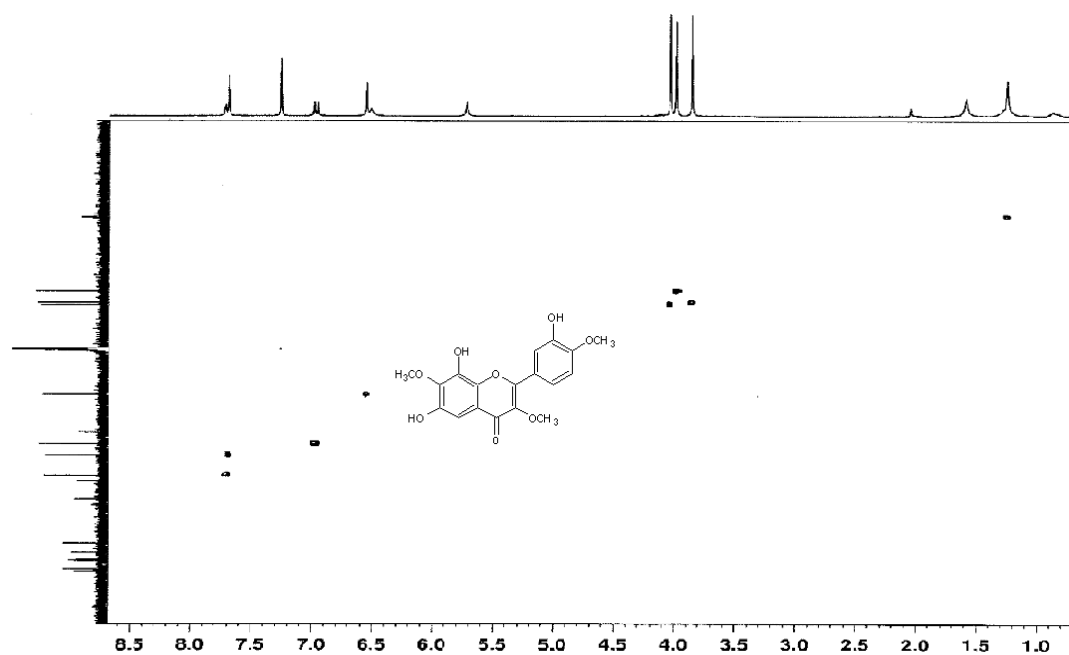

S13.HR-ESI-MS spectrum of **Compound 2**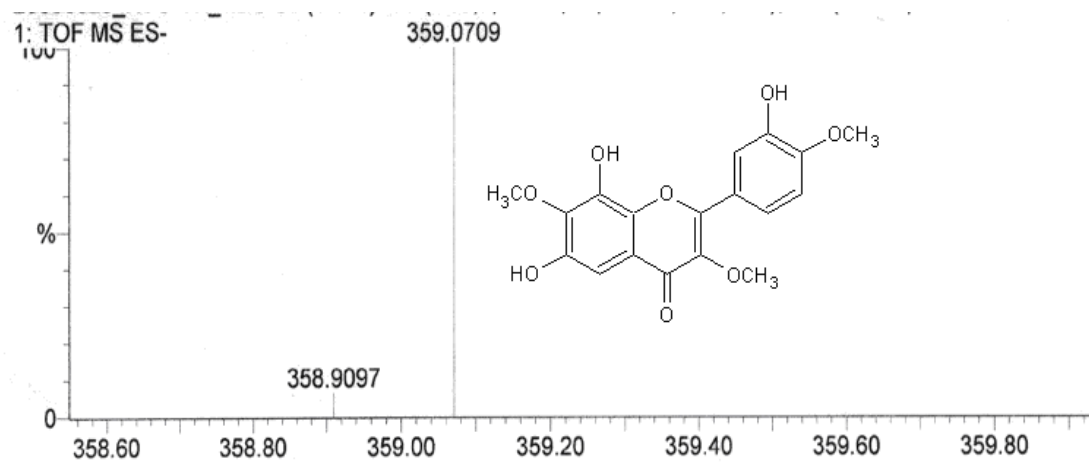

Supplement: Supplementary file 1 [file molecules-15-06357-s001.pdf]
